# Supplementary material
Source: MDPI journal article supplement (https://www.mdpi.com/2073-4433/10/11/702)
Supplement: s1 [file s1]

## Supplemental Materials

for

# Improved dust emission reduction factor in the ADAM2 model using real-time MODIS NDVI

Sang-Sam Lee \*, Yun-Kyu Lim, Jeong Hoon Cho, Hee Choon Lee, and Sang-Boom Ryoo

Cum. Dust-rise Occ. Prob. Func. (Gobi) [2007-2016, wc = 07]

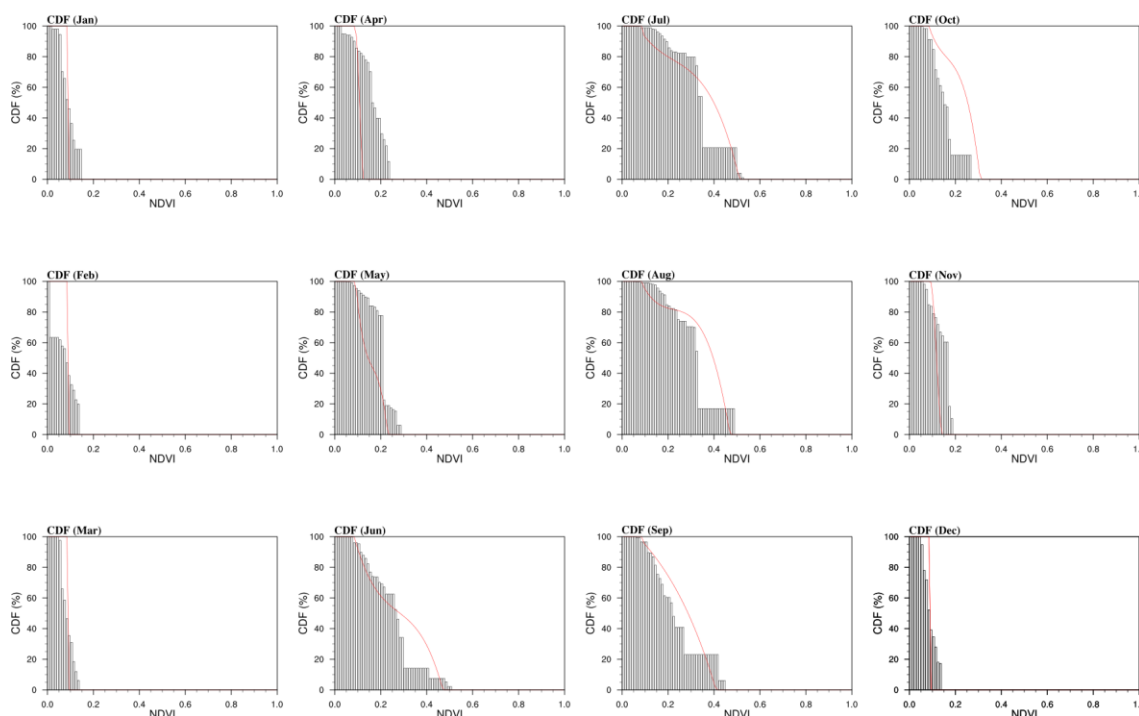

**Figure S1.** The cumulative dust-rise occurrence probability function (CDF) in Gobi soil type region for each month. The red line indicates the CDF in Park et al. (2010).

### Cum. Dust-rise Occ. Prob. Func. (Sand) [2007-2016, wc = 07]

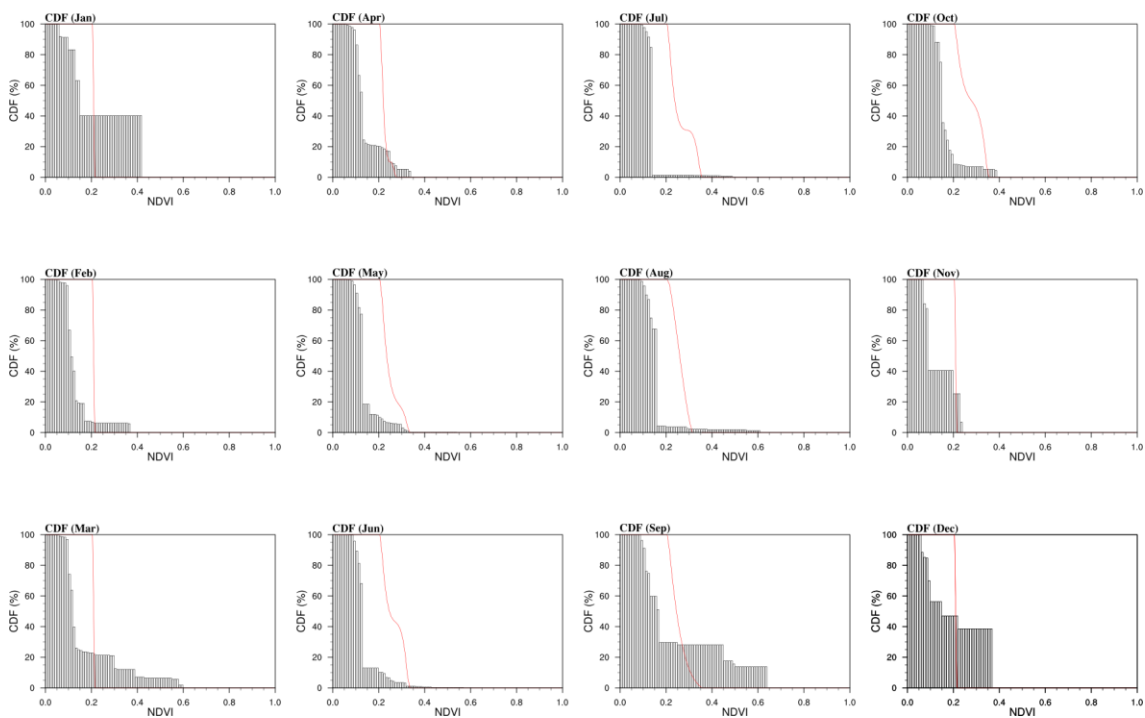

Figure S2. The same as Figure S1 except for the Sand soil type region.

### Cum. Dust-rise Occ. Prob. Func. (Loess) [2007-2016, wc = 07]

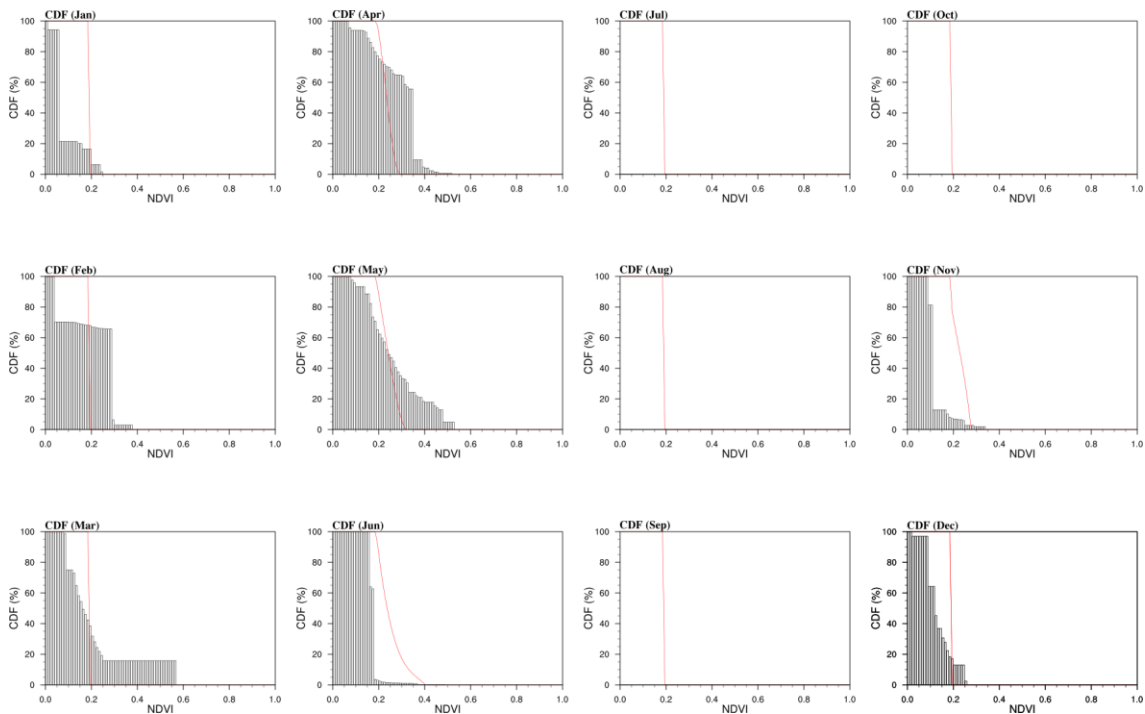

Figure S3. The same as Figure S1 except for the Loess soil type region.

## Cum. Dust-rise Occ. Prob. Func. (Mixed) [2007-2016, wc = 07]

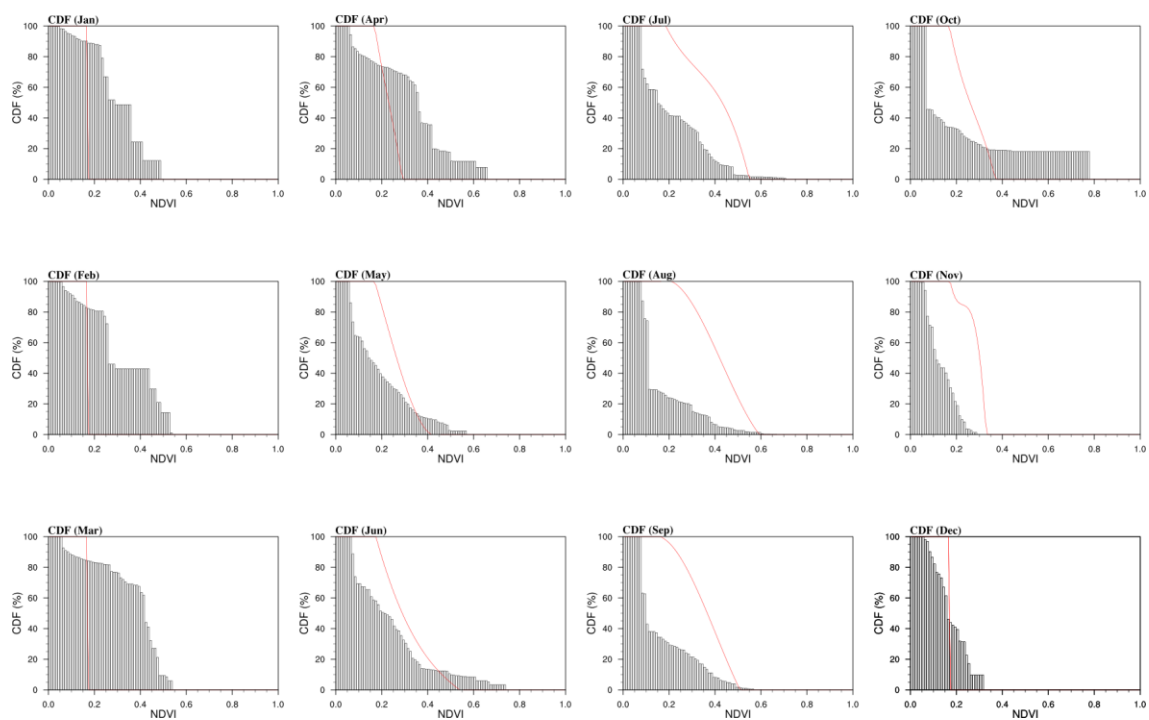

Figure S4. The same as Figure S1 except for the Mixed soil type region.
